# Supplementary material
Source: publisher site journal article supplement (https://www.dovepress.com/article/248130)
Supplement: Supplementary file 1 [file get_supplementary_file.php]

**Table S1.** Statues of antibiotic administration

|  |  | Antibiotic-treated Group (n=41) |
| --- | --- | --- |
| Type of Antibiotic | β-lactam ± inhibitors (± other) | 34 |
| Polyene Antifungals | 1 |
| Thiomycins | 1 |
| Quinolones (± other) | 3 |
| Aminoglycosides | 2 |
|  |  |  |
| Duration | ≤ 7 days | 24 |
| > 7 days | 17 |
|  |  |  |
| Antibiotic-administration | Intramuscular/Intravenous | 37 |
| Oral | 4 |
|  |  |  |
| Antibiotic indication | Granulocyte deficiency or Surgical prophylaxis | 13 |
| Flu-like syndrome | 4 |
| Pneumonia | 17 |
| Urinary tract infection | 2 |
| Mediastinal bronchial fistula | 3 |
| Gastroenteritis | 1 |
| Periodontal disease | 1 |
